# Supplementary material for: Substrate-restricted methanogenesis and limited volatile organic compound degradation in highly diverse and heterogeneous municipal landfill microbial communities
Source: PubMed Central journal article supplement (PMC9723747; doi:10.1038/s43705-022-00141-4), 2022-07-13
Supplement: 43705_2022_141_MOESM1_ESM.pdf [file 43705_2022_141_MOESM1_ESM.pdf]

**Substrate-restricted methanogenesis and limited volatile organic compound degradation in highly diverse and heterogeneous municipal landfill microbial communities**

Alexandra H. Sauk<sup>1</sup> and Laura A. Hug<sup>1</sup>

Department of Biology, University of Waterloo, Waterloo, ON, Canada

**Supplemental Tables and Figures**

**Supplemental Table 1: Number of shared 16S rRNA gene amplicon ASVs between samples.**

|        | CLC T1 | CLC T2 | LW1 | LW2 | LW3 | GW1 | GW2 |
|--------|--------|--------|-----|-----|-----|-----|-----|
| CLC_T1 |        | 1135   | 384 | 301 | 223 | 27  | 280 |
| CLC_T2 | 1135   |        | 431 | 486 | 234 | 13  | 295 |
| LW1    | 384    | 431    |     | 195 | 476 | 59  | 132 |
| LW2    | 301    | 486    | 195 |     | 119 | 8   | 142 |
| LW3    | 223    | 234    | 476 | 119 |     | 131 | 116 |
| GW1    | 27     | 13     | 59  | 8   | 131 |     | 46  |
| GW2    | 280    | 295    | 132 | 142 | 116 | 46  |     |

**Supplemental Table 2: Averaged environmental variable concentrations based on measurements from April and October 2016 for the groundwater wells and the three leachate wells.** Additional variables not included in the PCA analyses are presented in Supplemental Data Sheet 1.

| <i>Environmental Parameter</i>           | <i>units</i> | <i>GW1*</i> | <i>GW2</i> | <i>LW1</i>          | <i>LW2</i>          | <i>LW3</i> |
|------------------------------------------|--------------|-------------|------------|---------------------|---------------------|------------|
| Arsenic                                  | mg/L         | 0.02        | 0          | 0                   | 0.04                | 0          |
| Boron                                    | mg/L         | 0.79        | 0.01       | 2.10                | 7.53                | 1.45       |
| Cadmium                                  | mg/L         | 0           | 0          | 0.10e <sup>-3</sup> | 0                   | 0          |
| Calcium                                  | mg/L         | 240         | 86.50      | 175                 | 93.25               | 155        |
| Chromium                                 | mg/L         | 0           | 0          | 0.04                | 0.40                | 0.02       |
| Copper                                   | mg/L         | 0           | 0          | 0.01                | 0.36                | 0.03       |
| Iron                                     | mg/L         | 40          | 0.37       | 56.50               | 11.78               | 10.55      |
| Lead                                     | mg/L         | 0           | 0          | 0.01                | 0.05                | 0          |
| Magnesium                                | mg/L         | 38          | 24         | 145.50              | 145                 | 58.50      |
| Manganese                                | mg/L         | 1.20        | 0.03       | 0.32                | 0.29                | 0.67       |
| Mercury                                  | mg/L         | 0           | 0          | 0                   | 0.30e <sup>-3</sup> | 0          |
| Nickel                                   | mg/L         | 0.01        | 0          | 0.05                | 0.36                | 0.02       |
| Potassium                                | mg/L         | 16          | 1.40       | 345                 | 917.50              | 79.50      |
| Sodium                                   | mg/L         | 76          | 4.55       | 615                 | 2525                | 200        |
| Zinc                                     | mg/L         | 0           | 0          | 0.06                | 0.28                | 0.01       |
| Alkalinity total (as CaCO <sub>3</sub> ) | mg/L         | 687         | 250        | 2800                | 7025                | 1200       |
| Ammonia-N                                | mg/L         | 18          | 0          | 275                 | 1375                | 123.50     |
| Chloride                                 | mg/L         | 180         | 6.70       | 655                 | 3050                | 255        |
| Nitrite                                  | mg/L         | 0           | 0          | 0.01                | 46.24               | 0.01       |
| Sulfate                                  | mg/L         | 17          | 60.50      | 0                   | 70                  | 51.50      |
| Total dissolved solids                   | mg/L         | 1040        | 315        | 3255                | 9657.50             | 1345       |
| Total Kjeldahl nitrogen                  | mg/L         | 20          | 0.11       | 315                 | 1925                | 135        |
| Un-ionized ammonia                       | mg/L         | 0.03        | 0          | 2.32                | 99.88               | 0          |
| 1,4-Dichlorobenzene                      | ug/L         | 0           | 0          | 0                   | 0                   | 11.50      |
| Benzene                                  | ug/L         | 0.69        | 0          | 13.50               | 0                   | 5.50       |
| Chlorobenzene                            | ug/L         | 0           | 0          | 6                   | 0                   | 3.80       |
| Ethylbenzene                             | ug/L         | 0.13        | 0          | 275                 | 8.25                | 17.50      |
| m&p-Xylenes                              | ug/L         | 0.07        | 0.06       | 1040                | 26.25               | 200        |
| o-Xylene                                 | ug/L         | 0.06        | 0          | 250                 | 17.05               | 11.20      |
| Toluene                                  | ug/L         | 0           | 0          | 17                  | 0                   | 0          |

\*All measurements for GW1 except the volatile compounds (1,4-dichlorobenzene to toluene) are from April 2011 and are for comparison only. These values were not included in the PCA analysis.

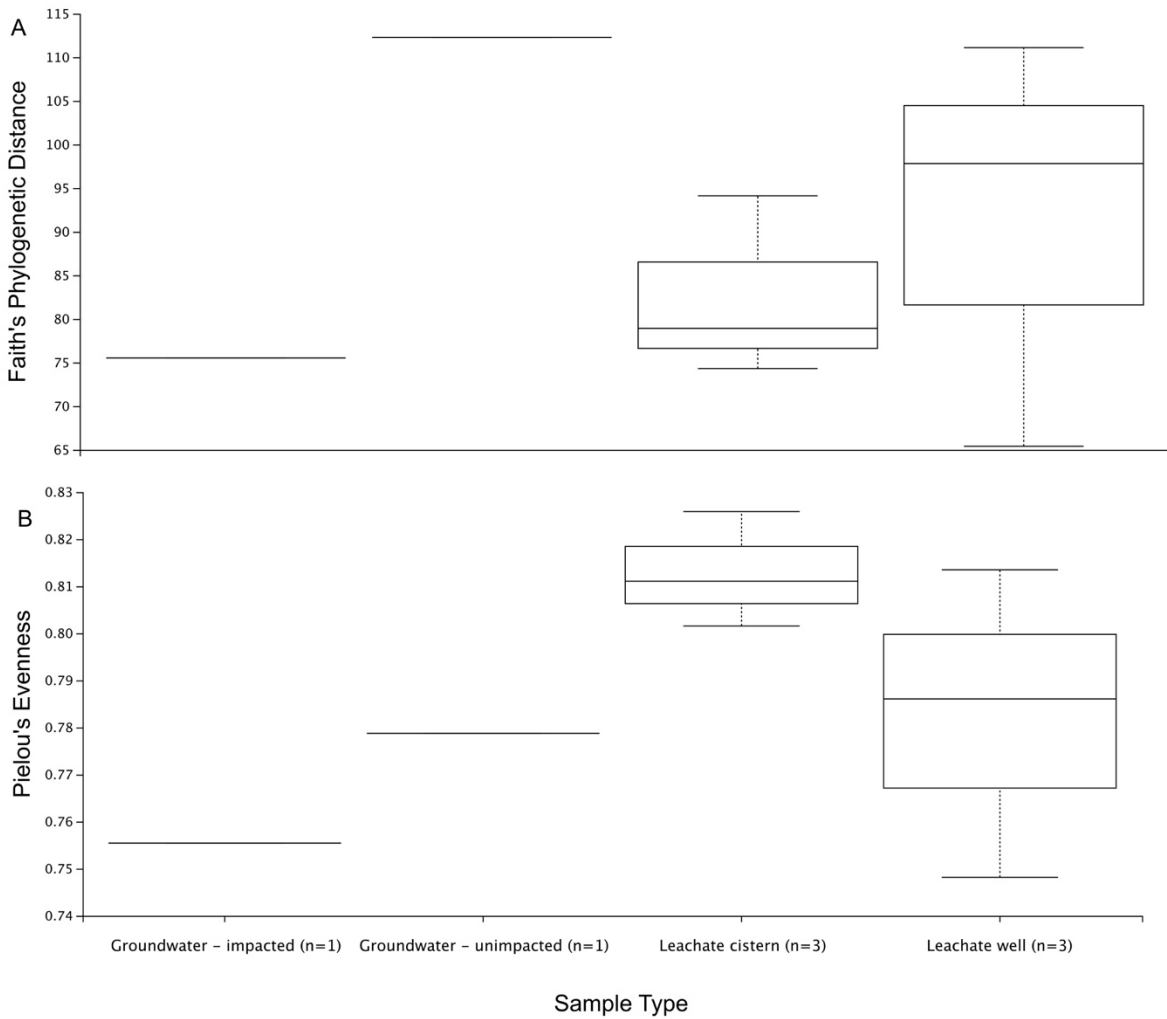

**Supplemental Figure 1: Alpha diversity analyses by sample type for Faith's Phylogenetic Diversity and Pielou's Evenness.** A) Faith's phylogenetic diversity. A Kruskal-Wallis test for all groups is not significant ( $H=2.77$  and  $p=0.43$ ). Kruskal-Wallis pairwise tests are also not significant for all pairs ( $p \geq 0.18$ ). B) Pielou's evenness. All sample types show high levels of evenness among their respective species ( $J' > 0.74$ ). A Kruskal-Wallis test for all groups is not significant ( $H=3.22$  and  $p=0.36$ ). Kruskal-Wallis pairwise tests are also not significant for all pairs ( $p \geq 0.18$ ).

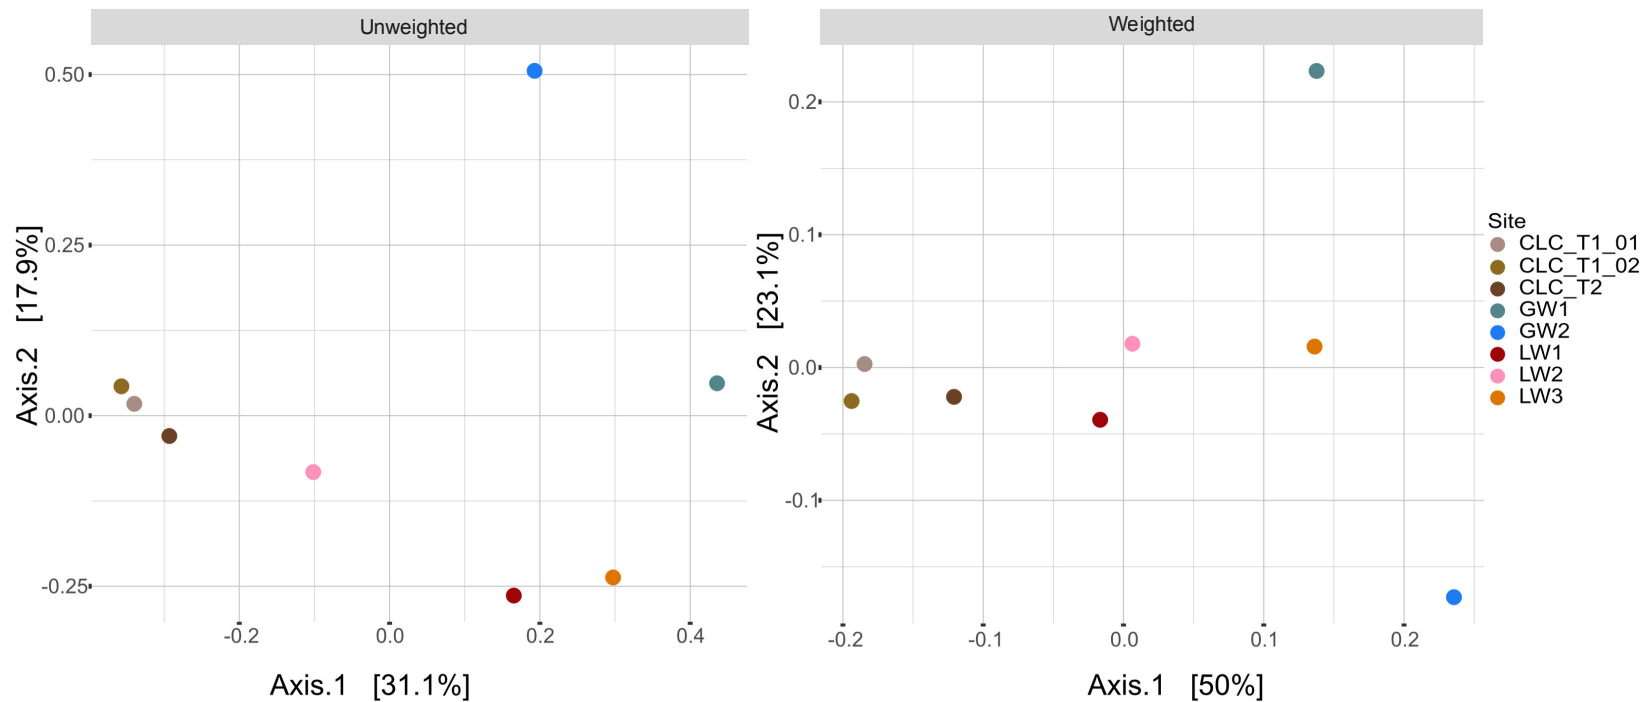

Supplemental Figure 2: PCoA using unweighted and weighted UniFrac distances based on 16S rRNA ASVs for all sites.

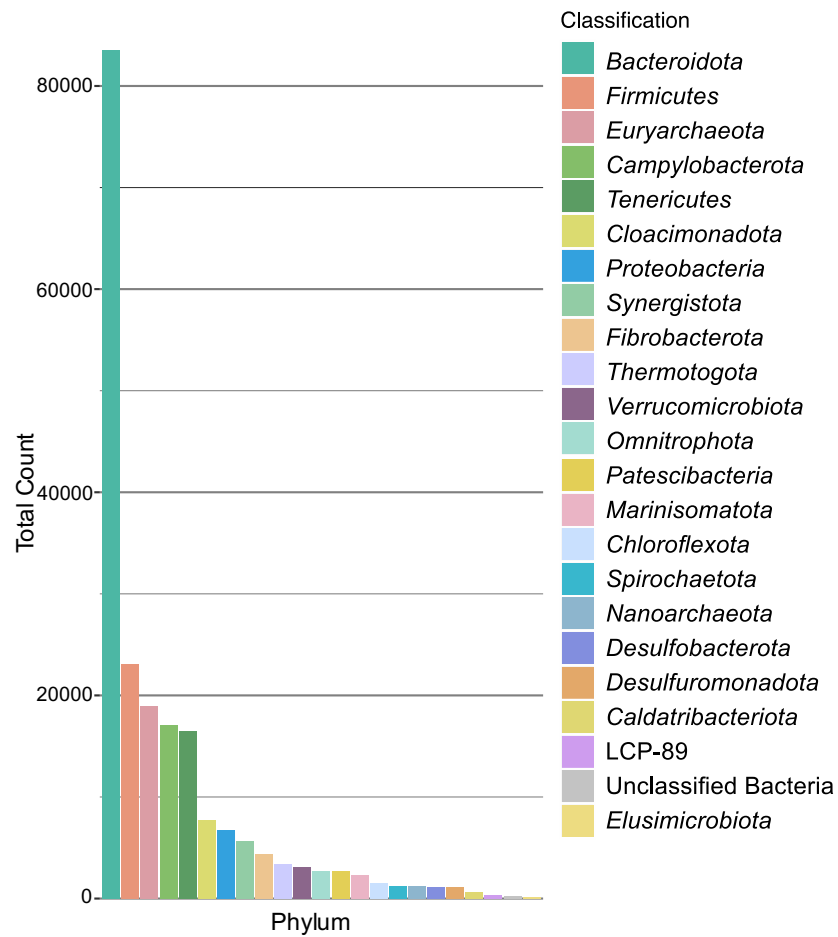

**Supplemental Figure 3: 16S rRNA gene amplicon ASVs in five or more sites by total sequence count and phylum.**

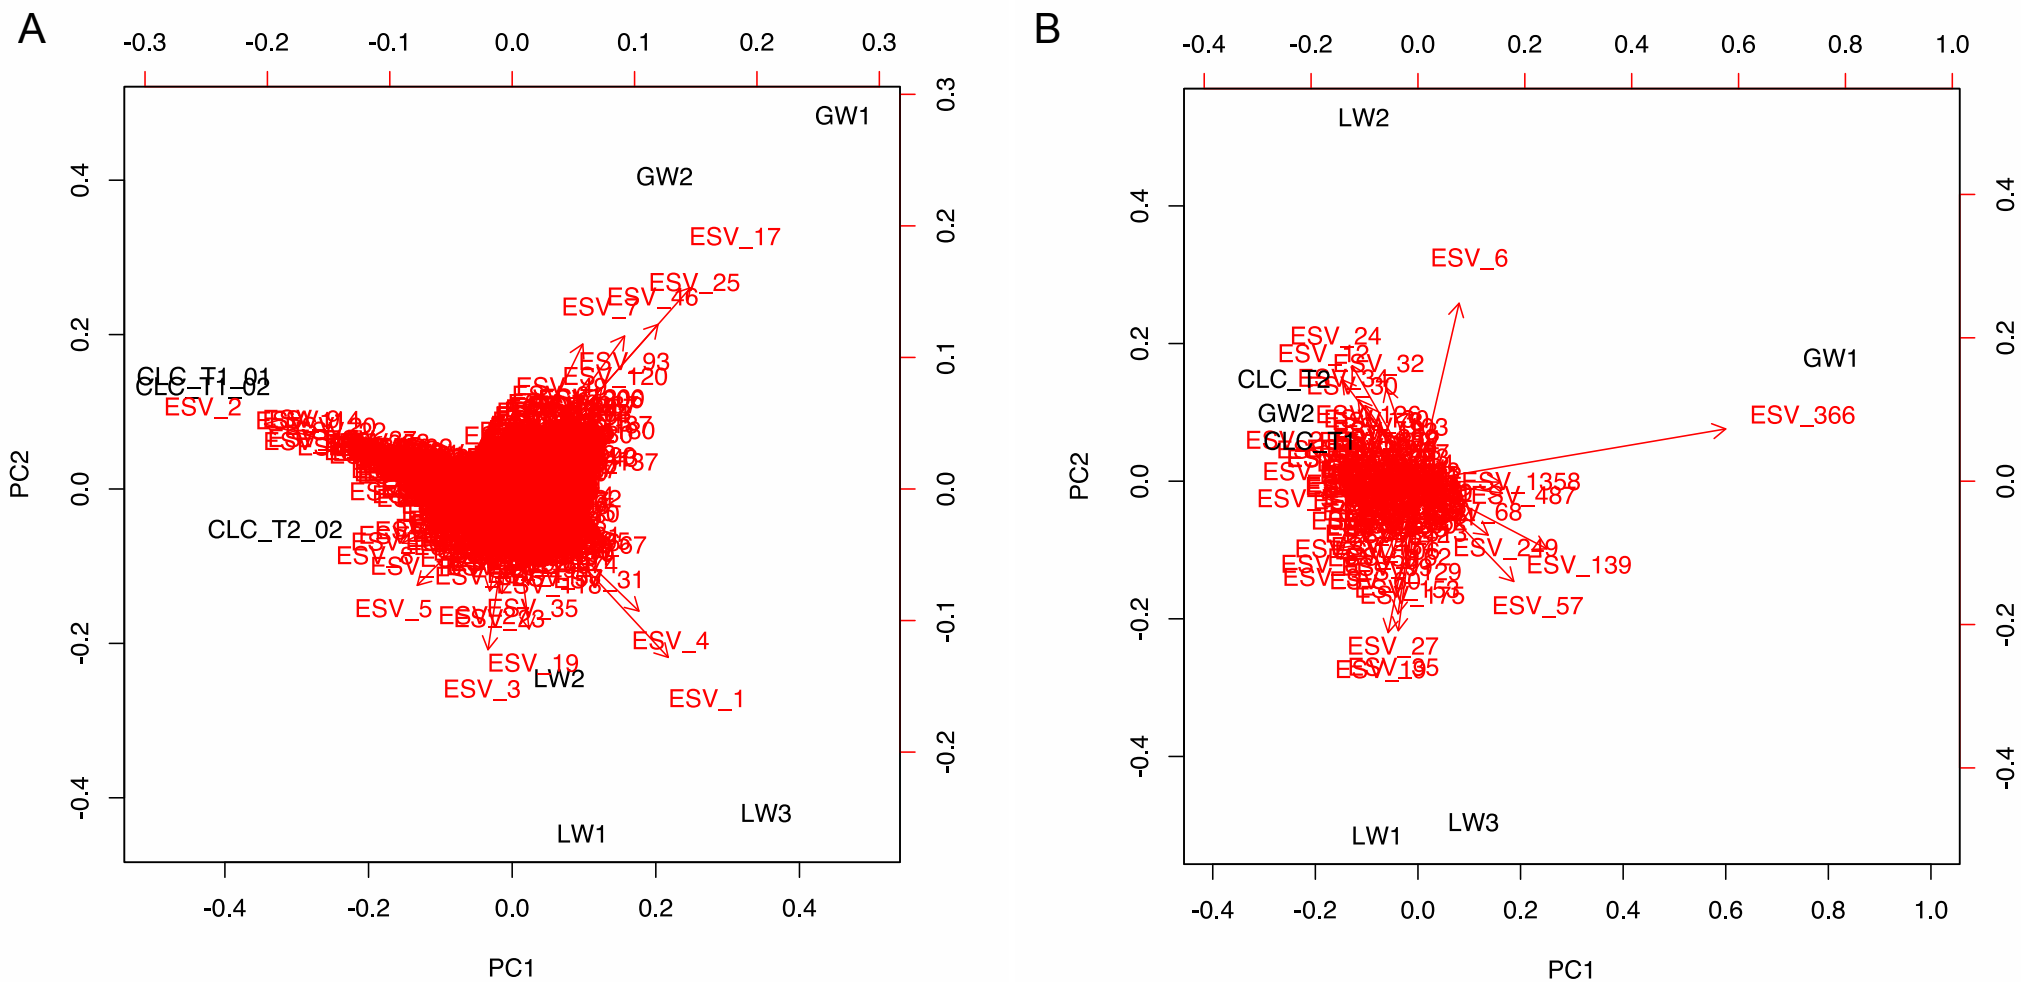

**Supplemental Figure 4:** Principal component analysis for (A) all 16S rRNA gene amplicon ASVs and (B) those present at five or more sites. ASV count data was Hellinger transformed.
